# Supplementary material
Source: publisher figshare collection journal article supplement (https://diabetesjournals.figshare.com/ndownloader/files/39376163)
Supplement: Supplementary file 1 [file 39376163]

## Supplementary Appendix

### Frohnert et al.: Refining the Definition of Stage 1 Type 1 Diabetes: An Ontology-Driven Analysis of the Heterogeneity of Multiple Islet Autoimmunity

#### **Table of Contents**

|                                                         |    |
|---------------------------------------------------------|----|
| The T1DI Study Group .....                              | 2  |
| Measurement of islet autoantibodies by study site ..... | 3  |
| Supplementary Table 1 .....                             | 6  |
| Supplementary Table 2 .....                             | 7  |
| Supplementary Table 3 .....                             | 7  |
| Supplementary Table 4 .....                             | 7  |
| Supplementary Table 5 .....                             | 7  |
| Supplementary Table 6 .....                             | 7  |
| Supplementary Figure 1: .....                           | 8  |
| Supplementary Figure 2 .....                            | 9  |
| Supplementary Figure 3 .....                            | 10 |
| Supplementary Figure 4 .....                            | 11 |
| Supplementary Figure 5 .....                            | 12 |
| References .....                                        | 13 |

## **The T1DI Study Group**

**BABYDIAB:** Anette G. Ziegler, M.D., Ezio Bonifacio Ph.D., Peter Achenbach, M.D., Christiane Winkler, Ph.D. Forschergruppe Diabetes e.V. and Institute of Diabetes Research, Helmholtz Zentrum München, German Research Center for Environmental Health, Munich-Neuherberg, Germany der TU München, Munich, Germany

**DAISY:** Marian Rewers, M.D., Ph.D., Brigitte I. Frohnert, M.D., Ph.D., Jill Norris, Ph.D., Andrea Steck, M.D., Kathleen Waugh, M.P.H., Liping Yu, M.D.; University of Colorado, Anschutz Medical Campus, Barbara Davis Center for Diabetes.

**DEW-IT:** William A. Hagopian, M.D., Ph.D., Michael Killian, Angela Wolf, Jocelyn Meyer, Claire Crouch, Jared Radtke; Pacific Northwest Research Institute.

**DiPiS:** Åke Lernmark, Ph.D., Helena Elding Larsson, M.D., Ph.D., Markus Lundgren, M.D., Ph.D., Marlena Maziarz, Ph.D., Lampros Spiliopoulos, Josefin Jönsson. Department of Clinical Sciences Malmö, Lund University.

**DIPP:** <sup>1</sup>Riitta Veijola, M.D., Ph.D., <sup>2</sup>Jorma Toppari, M.D., Ph.D., <sup>2</sup>Jorma Ilonen, M.D., Ph.D., <sup>3,4</sup>Mikael Knip, M.D., Ph.D.; <sup>1</sup>University of Oulu and Oulu University Hospital, <sup>2</sup>University of Turku and Turku University Hospital, <sup>3</sup>Tampere University Hospital, <sup>4</sup>University of Helsinki.

**IBM Research, Center for Computational Health:** Vibha Anand, Ph.D., Mohamed Ghalwash, Ph.D., Kenney Ng, Ph.D., Zhiguo Li, Ph.D., B.C. Kwon, Ph.D., Harry Stravopoulous, Eileen Koski, M.Phil, Ashwani Malhotra, Ph.D., Shelley Moore, Jianying Hu, Ph.D.

**T1DI Alumni:** Jessica Dunne, Ph.D., Bin Liu, Ph.D., Ying Li, Ph.D.

**JDRF:** Olivia Lou, PhD., Frank Martin. Ph.D.

## **Measurement of islet autoantibodies by study site**

### **BABYDIAB/BABYDIET:**

Measurements of IAA, GADA, IA-2A, and ZnT8A antibodies in venous blood samples were performed using radiobinding assays (RBAs) at the Institute of Diabetes Research, Helmholtz Center Munich. Positivity thresholds were based on the upper 99th centile and Q-Q plots of results from control children as described elsewhere (1–3). IAA levels were measured using a competitive RBA (4). Assays were evaluated by the Diabetes Antibody Standardization Program (DASP) and the Islet Autoantibody Standardization Program (IASP). (5–8)

### **DAISY:**

All antibodies were measured, in duplicate, from frozen serum samples. Autoantibody detection assays have been updated over the course of the 24 years study history as described below:

#### *Glutamic acid decarboxylase antibodies (GADA) and Islet antigen-2 antibodies (IA-2A):*

- From June 8, 1994 to Feb. 16, 2010, autoantibodies to GAD65 were measured utilizing a modified radioassay as described previously (9,10). Results were expressed as an index: (sample cpm-negative control cpm)/(positive control cpm-negative control cpm).
- From Nov. 17, 1995 to Feb. 16, 2010, autoantibodies to islet cell antigen 512 (IA-2) were measured utilizing a modified radioassay with in vitro transcribed and translated human ICA512bdc protein construct labeled with [<sup>35</sup>S]methionine. (10,11) The GADA and IA-2A autoantibodies were measured in a combined assay.
- From Feb. 22, 2010 to the present, the GADA and IA-2A assays were standardized to be brought into alignment with Bristol, UK and Munich, Germany labs. (3)

Samples which tested positive were confirmed using a separately aliquoted sample from the same clinic visit blood draw.

Threshold for GADA was defined as the 97<sup>th</sup> percentile and IA-2A were defined as the 99<sup>th</sup> percentile of antibody level for healthy population controls .(3)

#### *Insulin autoantibodies (IAA):*

- From March 15, 1994 to Dec. 18, 1998, insulin autoantibodies (IAA) were measured using a quantitative radioimmunoassay, competitive insulin assay (cIAA) as described previously (12). Due to the large serum sample required, testing was not routinely repeated.
- From Jan. 27, 1999 to present, IAA is measured using a micro-IAA assay (mIAA), which utilizes ELISA techniques and Protein A-Sepharose (13). Positive samples were repeated for confirmation.

Threshold for IAA was defined as the 99<sup>th</sup> percentile of antibody level for healthy population controls (13)

### **DEW-IT:**

Radiolabeled whole Glutamate Decarboxylase (GAD65), the intracellular portion of insulinoma antigen-2 (IA2), and human insulin were incubated separately in triplicate wells with 2 to 5 uL of patient serum, then captured by Protein A, washed extensively to remove unbound antigen, and counted. Results were expressed using an index relative to specific positive control and negative control sera as described, with each cutoff defined as the 99<sup>th</sup> percentile of >200 individual healthy population controls. (14) Samples close to the cutoff, and those where triplicate well CV's were >30%, were reflexively repeated. The laboratory participates in a DASP/IASP proficiency testing, with DEW-IT assays exceeding mean performance of all participating laboratories for all 4 antigens over each of 12 consecutive workshops. The four autoantibodies assays are each CLIA certified (CLIA# 50D0982418).

### **DiPiS:**

#### *Autoantibodies to GAD65 and IA-2: Analysis in dried blood spots, serum or plasma*

GAD65 autoantibodies (GADA) and IA-2 autoantibodies (IA2A) were analyzed from dried blood spots (DBS) with a radioligand binding assay (RBA) as previously described (9). GADA and IA2A levels were expressed as units per mL (U/mL) derived from the WHO standard 97/550. The samples were considered to be positive if the IA2A levels were above 5 U/mL or the GADA levels were above 34 U/mL, which represent the 99<sup>th</sup> percentile for healthy controls (15).

#### *Autoantibodies to IAA*

Analysis for IAA was first performed using a noncompetitive method with radiolabeled insulin and serum samples. Positive samples for IAA were further analyzed in duplicate using a competitive method and radiolabeled insulin. IAA levels were calculated as relative units and were related to positive controls. Positivity for IAA was set to 1.9 relative units, which represents the 99<sup>th</sup> percentile for healthy controls (15). The competitive method was used to verify false-positive binding in the noncompetitive assay. In subsequent analysis, the competitive assay results were used.

### **DIPP:**

Islet autoantibodies reported in this analysis were analyzed in the Research Laboratory, Department of Pediatrics, University of Oulu, Oulu, Finland. The biochemical autoantibodies IAA, GADA, and IA-2A were analyzed with specific radiobinding assays. ICA was used as the primary screening tool for the beta-cell autoimmunity in children born in 1994-2002. In all children with ICA positivity, IAA, IA-2A and GADA were then measured from all samples. For children born 2003 or later, ICA, IAA, IA-2A and GADA were measured at every visit. The reference values for the IAA, GADA, and IA-2A assays were based on the 99<sup>th</sup> percentile of more than 370 non-diabetic Finnish children and adolescents.

#### Islet cell antibodies (ICA)

ICA were quantified by standard immunofluorescence on sections of frozen human pancreas, blood group O donor. Fluorescein-conjugated antihuman IgG (Sigma-Aldrich Corp., St. Louis, MO) was used for detection. The end-point dilution titers of the ICA-positive samples

were recorded, and the results were expressed in Juvenile Diabetes Foundation units (JDF-U). The detection limit was 2.5 JDF-U.

#### *Insulin Autoantibodies (IAA)*

Serum levels of IAA were quantified with a microassay modified from the method described by Williams et al. (16,17) The IAA titers representing specific binding were expressed in relative units (RU) based on a standard curve run on each plate. A subject was considered positive for IAA when the specific binding exceeded 99th percentile in 371 nondiabetic Finnish subjects.

#### *Autoantibodies to GAD65 (GADA)*

GADA were measured by a radiobinding assay as previously described (18). The results were expressed in relative units on the basis of a standard curve. The cut-off limit for positivity was at the 99th percentile for 373 nondiabetic Finnish children and adolescents.

#### *Autoantibodies to islet antigen 2 (IA-2A)*

IA-2A were quantified by a radiobinding assay as previously described by (19). Antibody titers were expressed in relative units based on a standard curve. The cut-off limit for positivity was defined by the 99th percentile in 374 healthy Finnish children and adolescents.

**Supplementary Table 1: Representation of persistence or reversion of islet autoantibodies (IAb) at two time points (t<sub>0</sub>, t<sub>1</sub>) for those who begin with multiple islet mIA/Persistent/2 positive status. NA: not available**

| Number of IAb @ t <sub>0</sub> | Number of IAb @ t <sub>1</sub> | mIA/Persistent/2 category at t <sub>1</sub> | N at t <sub>1</sub> = 2 ± 0.5 years (total N=521) |
|--------------------------------|--------------------------------|---------------------------------------------|---------------------------------------------------|
| 3                              | 3                              | M-Sustained                                 | 251                                               |
| 2                              | 2                              | M-Sustained                                 |                                                   |
| 2                              | 3                              | M-Sustained                                 | 117                                               |
| 3                              | 2                              | M3-M2                                       | 42                                                |
| 2 or 3                         | 1                              | M-Single                                    | 87                                                |
| 2 or 3                         | 0                              | excluded                                    | 2                                                 |
| 2 or 3                         | NA                             | excluded                                    | 22                                                |

**Supplementary Table 2: P-values for pairwise comparisons of mIA definitions (Figure 1B).** P-values significant with Bonferroni correction for multiple comparisons ( $p < 0.0083$ ) indicated with shading.

|                         | mIA/SameVisit | mIA/Persistent/1 | mIA/Persistent/2 |
|-------------------------|---------------|------------------|------------------|
| <b>mIA/Any</b>          | 0.036         | 0.0014           | 2.8 e-8          |
| <b>mIA/SameVisit</b>    |               | 0.15             | 4.9 e-7          |
| <b>mIA/Persistent/1</b> |               |                  | 5.7 e-8          |

**Supplementary Table 3: P-values for pairwise comparisons of Progression to mIA/Persistent/2 by Quartiles at sIA/Persistent (Figure 2A).** P-values significant with Bonferroni correction for multiple comparisons ( $p < 0.0083$ ) indicated with shading.

|                      | Q2 (2.0, 3.5] | Q3 (3.5, 7.1] | Q4 (7.1, 18.7] |
|----------------------|---------------|---------------|----------------|
| <b>Q1 (0.0, 2.0]</b> | 3.1 e-5       | 7.8 e-17      | 6.2 e-22       |
| <b>Q2 (2.0, 3.5]</b> |               | 5.8 e-6       | 3.0 e-9        |
| <b>Q3 (3.5, 7.1]</b> |               |               | 0.14           |

**Supplementary Table 4: P-values for pairwise comparisons of Progression to stage 3 Type 1 diabetes by Quartiles at mIA/Persistent/2 status (Figure 2B).** P-values significant with Bonferroni correction for multiple comparisons ( $p < 0.0083$ ) indicated with shading.

|                      | Q2 (2.0, 3.5] | Q3 (3.5, 7.1] | Q4 (7.1, 18.7] |
|----------------------|---------------|---------------|----------------|
| <b>Q1 (0.0, 2.0]</b> | 0.0093        | 0.0016        | 3.5 e-5        |
| <b>Q2 (2.0, 3.5]</b> |               | 0.677         | 0.14           |
| <b>Q3 (3.5, 7.1]</b> |               |               | 0.29           |

**Supplementary Table 5: P-values for pairwise comparisons of mIA definitions at visit 2  $\pm$  0.5 years after baseline (Figure 3A).** P-values significant with Bonferroni correction for multiple comparisons ( $p < 0.0083$ ) indicated with shading.

|                         | mIA/SameVisit | mIA/Persistent/1 | mIA/Persistent/2 |
|-------------------------|---------------|------------------|------------------|
| <b>mIA/Any</b>          | 0.84          | 0.18             | 3.1 e-05         |
| <b>mIA/SameVisit</b>    |               | 0.16             | 2.4 e-06         |
| <b>mIA/Persistent/1</b> |               |                  | 9.0 e-06         |

**Supplementary Table 6: P-values for pairwise comparisons of persistence category (Figure 3B).** P-values significant with Bonferroni correction for multiple comparisons ( $p < 0.017$ ) indicated with shading.

|                    | M-Sustained | M-Single |
|--------------------|-------------|----------|
| <b>M3-M2</b>       | 0.002       | 0.0013   |
| <b>M-Sustained</b> |             | 0.30     |

**Supplementary Figure 1: Highest stringency and persistence at immediate next visit after mIA positivity.**

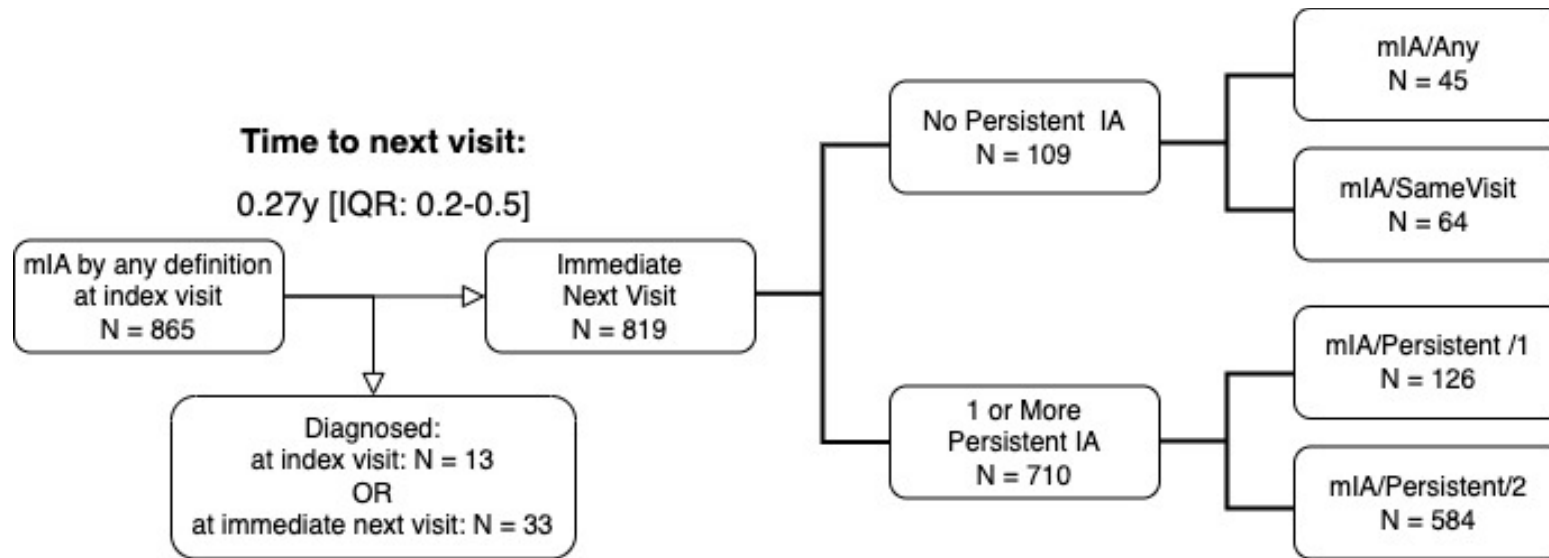



**Supplementary Figure 2: Persistence Status for Figure 3A. Cumulative incidence of type 1 diabetes from mIA positive status in the infant-toddler cohort by highest stringency in  $2 \pm 0.5$  years later visit.** Median age at index visit was 3.8 [IQR: 2.0-7.3] years and was 5.8 years (IQR 4.0-9.0) at the 2-year visit.

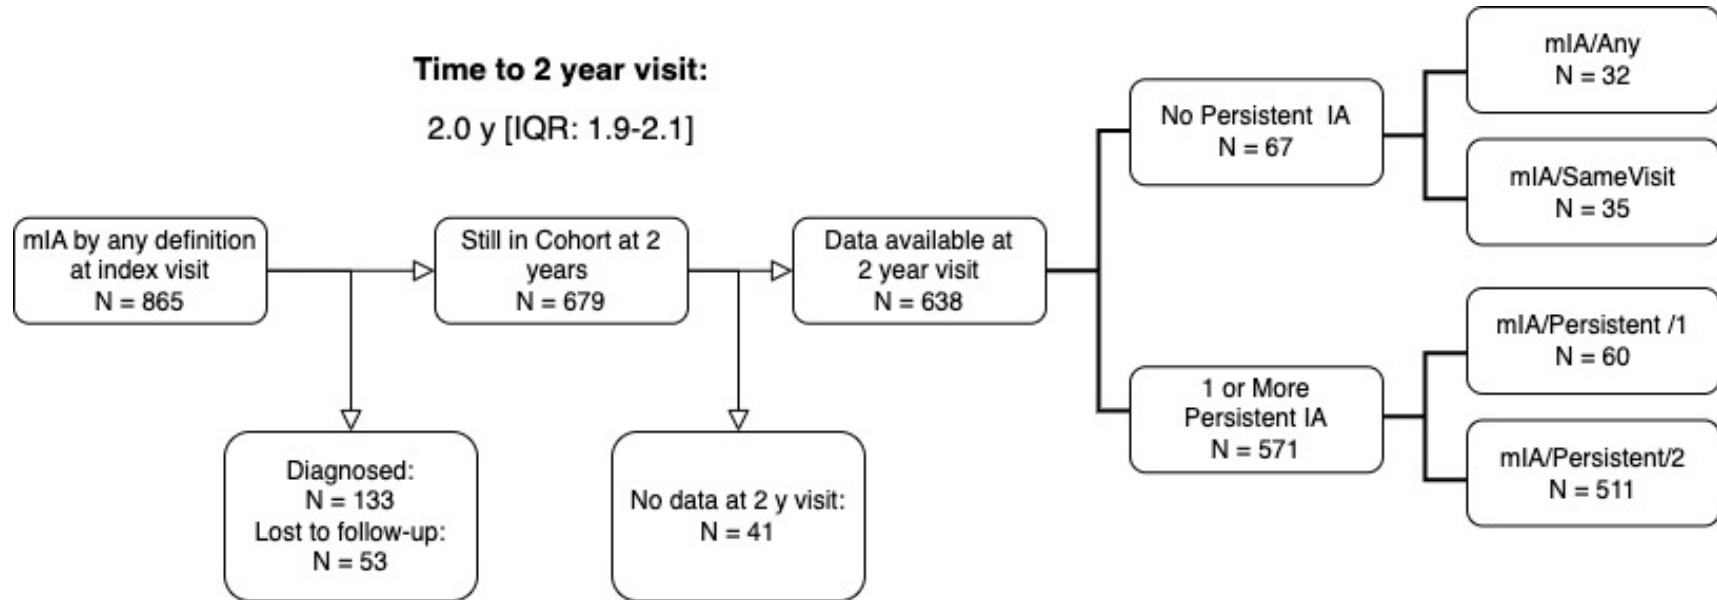

**Supplementary Figure 3: Cumulative incidence of type 1 diabetes in 15 years in the infant-toddler cohort for those who were mIA/Persistent/1 or mIA/Persistent/2 at baseline (N=591), stratified by persistence category at 2-year follow-up (P = 2.031e-06).**

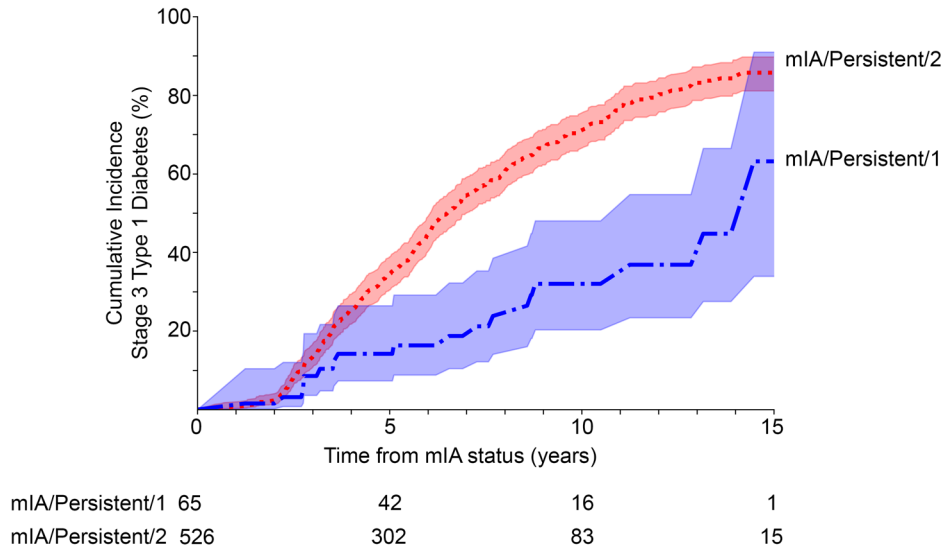

# Supplementary Figure 4: Cumulative incidence of type 1 diabetes in mIA

individuals stratified at by highest stringency of mIA definition achieved at (A)  $1 \pm 0.5$  and (B)  $5 \pm 0.5$  years follow-up. (C) and (D) tables of pair-wise comparisons.

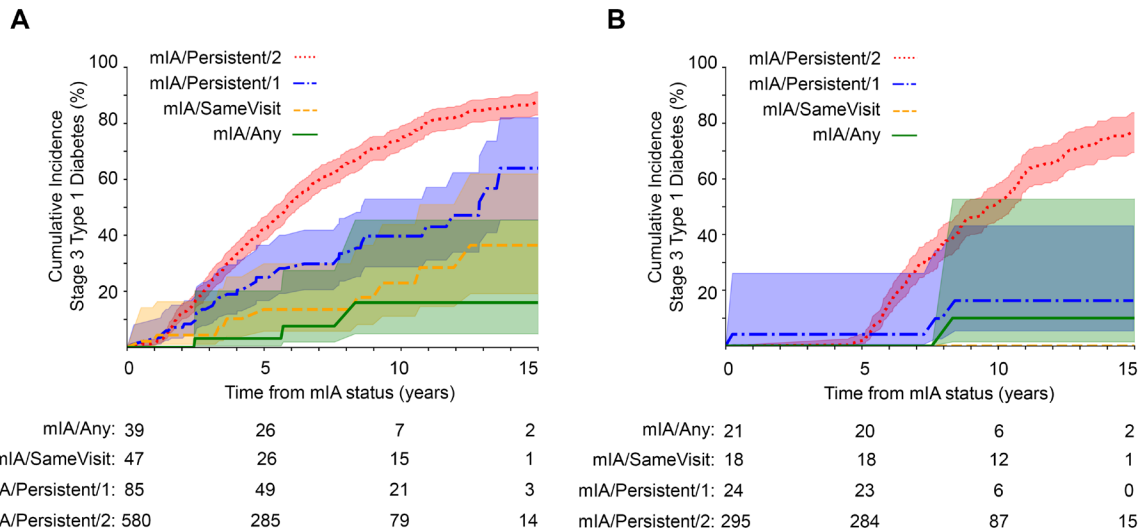

(C) P-values for pairwise comparisons of mIA definitions at visit  $1 \pm 0.5$  years after baseline (panel A above). P-values significant with Bonferroni correction for multiple comparisons ( $p < 0.0083$ ) indicated with shading.

|                         | mIA/SameVisit | mIA/Persistent/1 | mIA/Persistent/2 |
|-------------------------|---------------|------------------|------------------|
| <b>mIA/Any</b>          | 0.23          | 0.0059           | 3.1 e-07         |
| <b>mIA/SameVisit</b>    |               | 0.056            | 3.4 e-07         |
| <b>mIA/Persistent/1</b> |               |                  | 1.6 e-06         |

(D) P-values for pairwise comparisons of mIA definitions at visit  $5 \pm 0.5$  years after baseline (panel B above). P-values significant with Bonferroni correction for multiple comparisons ( $p < 0.0083$ ) indicated with shading.

|                         | mIA/SameVisit | mIA/Persistent/1 | mIA/Persistent/2 |
|-------------------------|---------------|------------------|------------------|
| <b>mIA/Any</b>          | 0.25          | 0.51             | 0.0018           |
| <b>mIA/SameVisit</b>    |               | 0.11             | 4.3 e-05         |
| <b>mIA/Persistent/1</b> |               |                  | 0.0029           |

**Supplementary Figure 5: Cumulative incidence of type 1 diabetes by age quartile based on (A) any definition of mIA and more stringent (B) mIA/Persistent/2 at  $2 \pm 0.5$  years of follow up. (C) and (D) tables of pair-wise comparisons.**

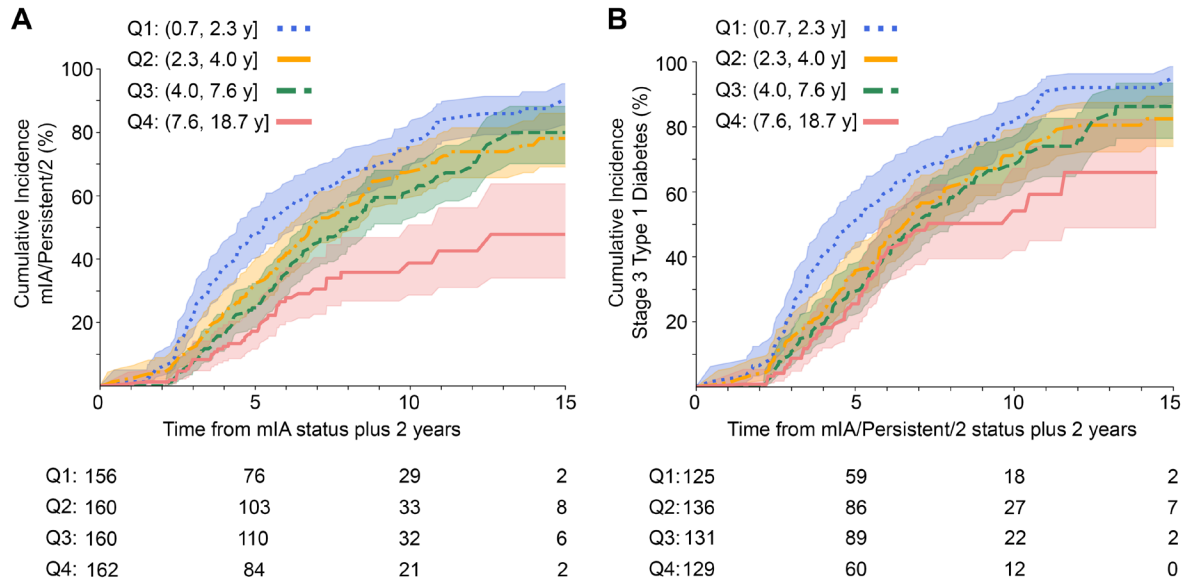

**(C) P-values for pair-wise comparisons for panel A.** P-values significant with Bonferroni correction for multiple comparisons ( $p < 0.0083$ ) indicated with shading.

|               | Q2 (2.3, 4.0] | Q3 (4.0, 7.6] | Q4 (7.6, 18.7] |
|---------------|---------------|---------------|----------------|
| Q1 (0.7, 2.3] | 0.0113        | 0.0004        | 3.205e-10      |
| Q2 (2.3, 4.0] |               | 0.228         | 6.898e-05      |
| Q3 (4.0, 7.6] |               |               | 0.0022         |

**(D) P-values for pair-wise comparisons for panel B.** P-values significant with Bonferroni correction for multiple comparisons ( $p < 0.0083$ ) indicated with shading.

|               | Q2 (2.3, 4.0] | Q3 (4.0, 7.6] | Q4 (7.6, 18.7] |
|---------------|---------------|---------------|----------------|
| Q1 (0.7, 2.3] | 0.006         | 0.0012        | 1.43 e -05     |
| Q2 (2.3, 4.0] |               | 0.583         | 0.062          |
| Q3 (4.0, 7.6] |               |               | 0.205          |

## **References**

1. Ziegler AG, Hummel M, Schenker M, Bonifacio E. Autoantibody appearance and risk for development of childhood diabetes in offspring of parents with type 1 diabetes: the 2-year analysis of the German BABYDIAB Study. *Diabetes*. 1999 Mar;48(3):460–8.
2. Achenbach P, Lampasona V, Landherr U, Koczwara K, Krause S, Grallert H, et al. Autoantibodies to zinc transporter 8 and SLC30A8 genotype stratify type 1 diabetes risk. *Diabetologia*. 2009 Sep;52(9):1881–8.
3. Bonifacio E, Yu L, Williams AK, Eisenbarth GS, Bingley PJ, Marcovina SM, et al. Harmonization of glutamic acid decarboxylase and islet antigen-2 autoantibody assays for national institute of diabetes and digestive and kidney diseases consortia. *J Clin Endocrinol Metab*. 2010 Jul;95(7):3360–7.
4. Williams AJ, Bingley PJ, Bonifacio E, Palmer JP, Gale EA. A novel micro-assay for insulin autoantibodies. *J Autoimmun*. 1997 Oct;10(5):473–8.
5. Törn C, Mueller PW, Schlosser M, Bonifacio E, Bingley PJ, Participating Laboratories. Diabetes Antibody Standardization Program: evaluation of assays for autoantibodies to glutamic acid decarboxylase and islet antigen-2. *Diabetologia*. 2008 May;51(5):846–52.
6. Wyatt R, Williams AJK. Islet Autoantibody Analysis: Radioimmunoassays. *Methods Mol Biol Clifton NJ*. 2016;1433:57–83.
7. Lampasona V, Schlosser M, Mueller PW, Williams AJK, Wenzlau JM, Hutton JC, et al. Diabetes Antibody Standardization Program: First Proficiency Evaluation of Assays for Autoantibodies to Zinc Transporter 8. *Clin Chem*. 2011 Dec 1;57(12):1693–702.
8. Lampasona V, Pittman DL, Williams AJ, Achenbach P, Schlosser M, Akolkar B, et al. Islet Autoantibody Standardization Program 2018 Workshop: Interlaboratory Comparison of Glutamic Acid Decarboxylase Autoantibody Assay Performance. *Clin Chem*. 2019 Sep 1;65(9):1141–52.
9. Grubin CE, Daniels T, Toivola B, Landin-Olsson M, Hagopian WA, Li L, et al. A novel radioligand binding assay to determine diagnostic accuracy of isoform-specific glutamic acid decarboxylase antibodies in childhood IDDM. *Diabetologia*. 1994 Apr 1;37(4):344–50.
10. Yu L, Rewers M, Gianani R, Kawasaki E, Zhang Y, Verge C, et al. Antiislet autoantibodies usually develop sequentially rather than simultaneously. *J Clin Endocrinol Metab*. 1996 Dec;81(12):4264–7.
11. Gianani R, Rabin DU, Verge CF, Yu L, Babu SR, Pietropaolo M, et al. ICA512 autoantibody radioassay. *Diabetes*. 1995 Nov;44(11):1340–4.
12. Vardi P, Dib SA, Tuttleman M, Connelly JE, Grinbergs M, Radizabeh A, et al. Competitive insulin autoantibody assay. Prospective evaluation of subjects at high risk for development of type I diabetes mellitus. *Diabetes*. 1987 Nov;36(11):1286–91.
13. Yu L, Robles DT, Abiru N, Kaur P, Rewers M, Kelemen K, et al. Early expression of antiinsulin autoantibodies of humans and the NOD mouse: evidence for early determination of subsequent diabetes. *Proc Natl Acad Sci U S A*. 2000 Feb 15;97(4):1701–6.

14. Woo W, LaGasse JM, Zhou Z, Patel R, Palmer JP, Campus H, et al. A novel high-throughput method for accurate, rapid, and economical measurement of multiple type 1 diabetes autoantibodies. *J Immunol Methods*. 2000 Oct 20;244(1–2):91–103.
15. Lundgren M, Lynch K, Larsson C, Larsson HE, Group for the DP in S study. Cord blood insulinoma-associated protein 2 autoantibodies are associated with increased risk of type 1 diabetes in the population-based Diabetes Prediction in Skåne study. *Diabetologia*. 2015 Jan 1;58(1):75–8.
16. Williams AJ, Bingley PJ, Bonifacio E, Palmer JP, Gale EA. A novel micro-assay for insulin autoantibodies. *J Autoimmun*. 1997 Oct;10(5):473–8.
17. Kukko M, Kimpimäki T, Korhonen S, Kupila A, Simell S, Veijola R, et al. Dynamics of Diabetes-Associated Autoantibodies in Young Children with Human Leukocyte Antigen-Conferred Risk of Type 1 Diabetes Recruited from the General Population. *J Clin Endocrinol Metab*. 2005 May 1;90(5):2712–7.
18. Savola K, Sabbah E, Kulmala P, Vähäsalo P, Ilonen J, Knip M. Autoantibodies associated with Type I diabetes mellitus persist after diagnosis in children. *Diabetologia*. 1998 Nov;41(11):1293–7.
19. Savola K, Bonifacio E, Sabbah E, Kulmala P, Vähäsalo P, Karjalainen J, et al. IA-2 antibodies - a sensitive marker of IDDM with clinical onset in childhood and adolescence. *Diabetologia*. 1998 Mar 20;41(4):424–9.
